# Supplementary material for: Shape-dependent electrocatalytic activity of monodispersed palladium nanocrystals toward formic acid oxidation
Source: Royal Society of Chemistry journal article supplement (doi:10.1039/c3nr03100d), 2013-01-01
Supplement: c3nr03100d.pdf [file c3nr03100d.pdf]

## Support Information

### **Shape-Dependent Electrocatalytic Activity of Monodisperse Palladium Nanocrystals toward Formic Acid Oxidation**

Xuwei Zhang,<sup>a,b</sup> Huajie Yin,<sup>a</sup> Jinfeng Wang,<sup>a</sup> Lin Chang,<sup>a</sup> Yan Gao,<sup>a</sup> Wei Liu\*<sup>b</sup> and Zhiyong Tang\*<sup>a</sup>

<sup>a</sup>*National Center for Nanoscience and Technology, Beijing 100190, P. R. China; Fax: +86-10 62656765; E-mail: zytang@nanoctr.cn*

<sup>b</sup>*Graduate University of Chinese Academy of Sciences, College of Chemistry & Chemical Engineering, Beijing 100049, China; Tel: +86-1088256414 ; E-mail: weiliu@ucas.ac.cn*

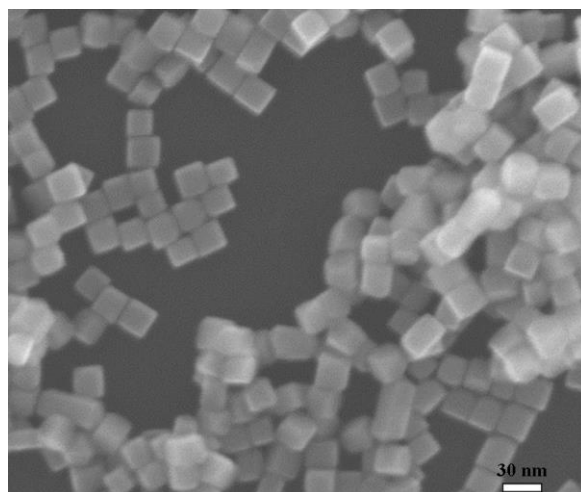

**Figure S1.** SEM images of 22 nm Pd nanocube seeds.

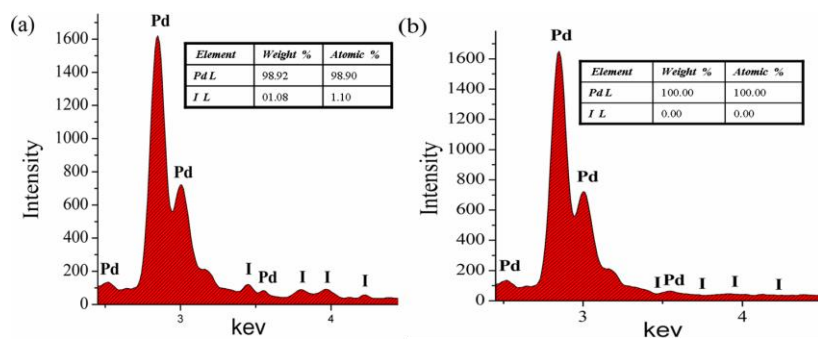

**Figure S2.** EDX pattern of Pd nanocrystals (a) before and (b) after treatment at 125 °C for 2.5 h.

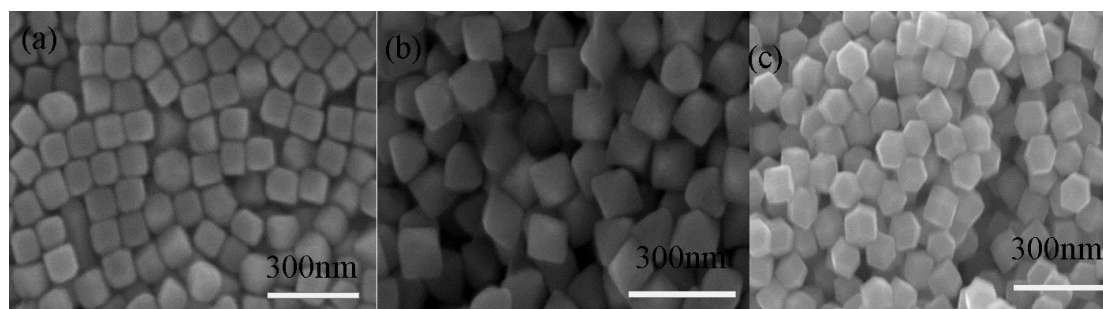

**Figure S3.** SEM images of as-synthesized Pd nanocrystals: (a) cubes, (b) octahedra and (c) rhombic dodecahedra.

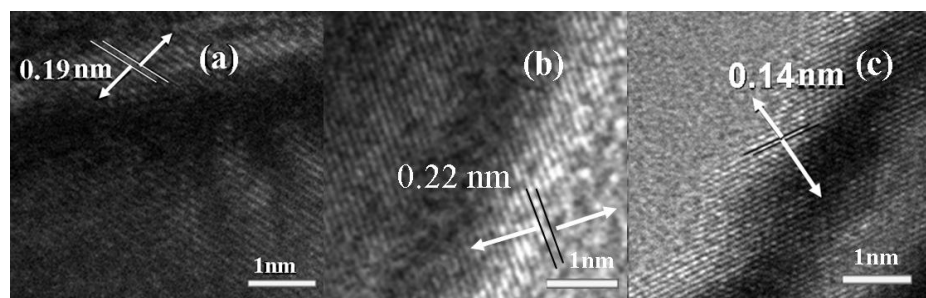

**Figure S4.** HRTEM images of Pd nanocrystals: (a) cube, (b) octahedron and (c) rhombic dodecahedron.
